# Supplementary material for: Epigenetic Silencing of MORT Is an Early Event in Cancer and Is Associated with Luminal, Receptor Positive Breast Tumor Subtypes
Source: PubMed Central journal article supplement — J Breast Cancer. 2017 Jun 26;20(2):198–202. doi: 10.4048/jbc.2017.20.2.198 (PMC5500404; doi:10.4048/jbc.2017.20.2.198), 2017-06-26
Supplement: jbc-20-198-s001.pdf [file jbc-20-198-s001.pdf]

## Silencing of *MORT* Is an Early Event in Cancer

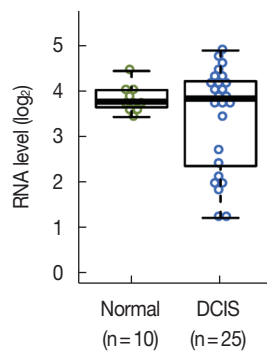

**Supplementary Figure 1.** *MORT* is silenced in a large fraction of ductal carcinoma *in situ* (DCIS) samples. The boxplots show *MORT* RNA level in a group of 10 normal organoids and 25 DCIS samples.
