# Supplementary material for: Epigenetic Silencing of MORT Is an Early Event in Cancer and Is Associated with Luminal, Receptor Positive Breast Tumor Subtypes
Source: PubMed Central journal article supplement — J Breast Cancer. 2017 Jun 26;20(2):198–202. doi: 10.4048/jbc.2017.20.2.198 (PMC5500404; doi:10.4048/jbc.2017.20.2.198), 2017-06-26
Supplement: jbc-20-198-s002.pdf [file jbc-20-198-s002.pdf]

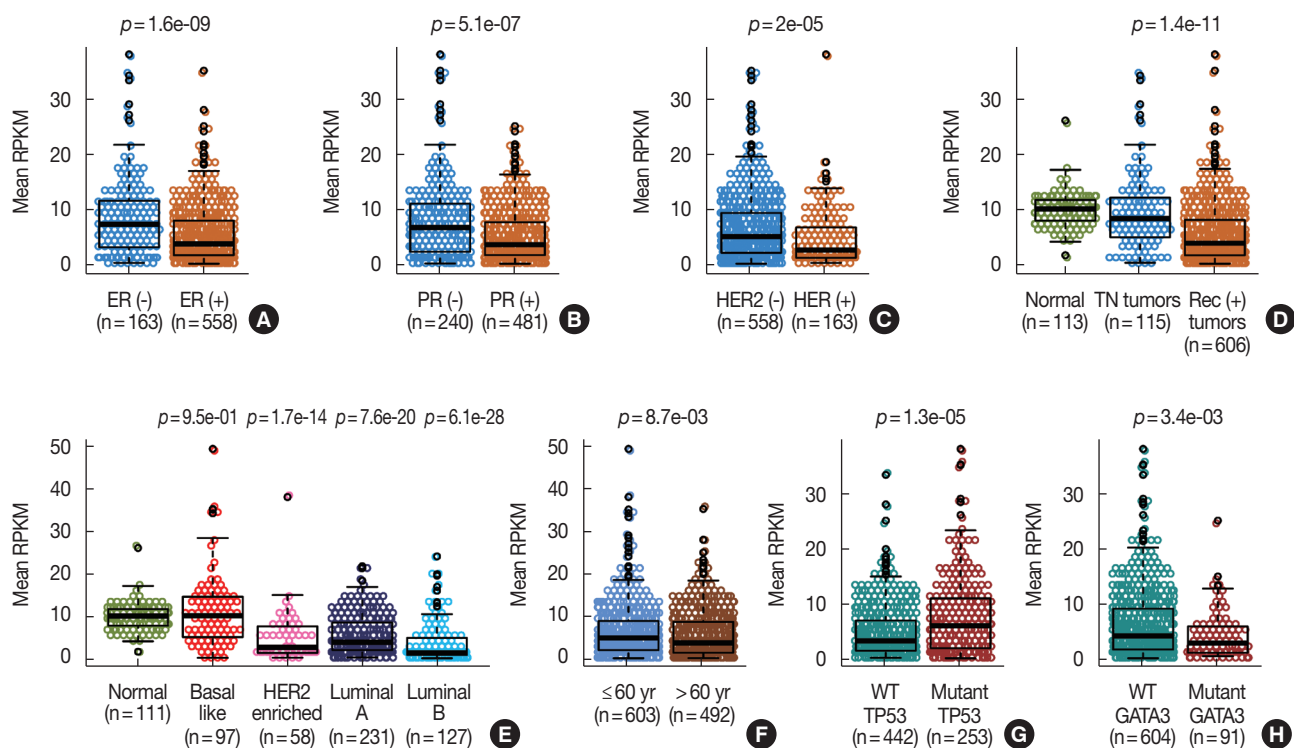

**Supplementary Figure 2.** *MORT* gene silencing is associated with the luminal, receptor positive tumor subtypes. *MORT* RNA level in tumor groups negative and positive for receptors estrogen receptor (ER) (A), progesterone receptor (PR) (B), and human epidermal growth factor receptor 2 (HER2) (C). (D) *MORT* RNA level in triple negative (TN) tumors compared to tumors positive in at least one receptor and a group of normal samples ( $p$ -value is for contrast between TN vs. receptor (+) tumors). (E) *MORT* RNA level in breast tumors classified into subtypes according to PAM50 ( $p$ -values are for contrast of individual tumor subtypes vs. normal). (F) *MORT* RNA level in samples from patients older than 60 years compared to those from patients up to 60 years old. (G) *MORT* RNA level in samples with wild type *TP53* compared to samples with mutated *TP53*. (H) *MORT* RNA level in samples with wild type *GATA3* compared to samples with mutated *GATA3*. RPKM=reads per kilobase per million; WT = wild type.
